# Supplementary material for: Role ofp73Dinucleotide Polymorphism in Prostate Cancer and p73 Protein Isoform Balance
Source: Hindawi journal article supplement (doi:10.1155/2014/129582), 2014-01-01

**Supplemental Figure 1. *p73* Gene and N-terminal isoforms of p73 protein.** The structure of the *p73* gene is depicted, including the *p73* gene exons (black filled boxes for all exons, except exon 1 and exon 4 are labeled unfilled boxes), introns (lines connecting boxes), and *p73* gene promoters (P1 & P2). The approximate position of the *p73* dinucleotide polymorphism (*p73* DNP) in exon 2 is indicated. The two major N-terminal protein isoforms of p73, TAp73 and  $\Delta$ Np73, are depicted (below the *p73* gene), including the major functional domains (TA = transactivation domain; DBD = DNA-binding domain; OD = oligomerization domain). The TAp73 form includes exons 1 through 3, which are absent in the  $\Delta$ Np73 isoforms.

**Supplemental Figure 1. *p73* Gene and N-terminal isoforms of p73 protein.**

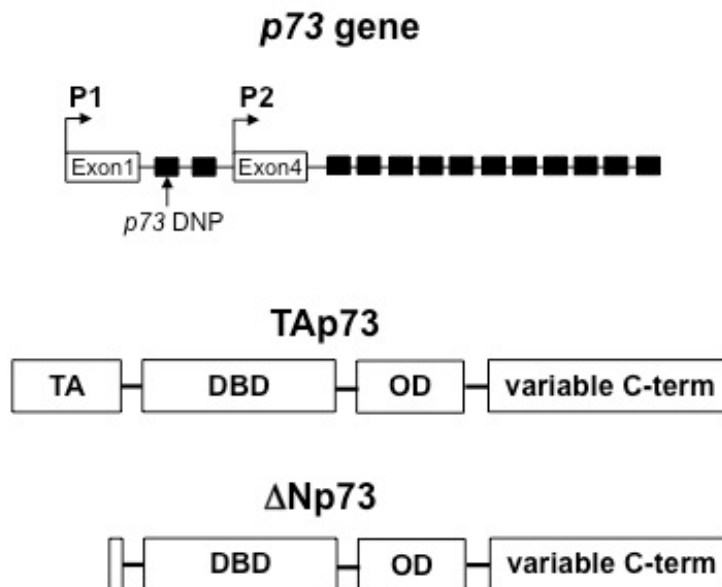

Supplement: f1 [file 129582.f1.pdf]
